# Supplementary material
Source: Royal Society of Chemistry journal article supplement (doi:10.1039/d6cc02439d)
Supplement: d6cc02439d1.pdf [file d6cc02439d1.pdf]

## *Supplementary Information*

# A Urea-Integrated Molecular Phenothiazine Cathode via Hydrogen-Bonding Engineering for High-Performance Lithium Organic Batteries

*Jing Zeng, Shujuan Cao, Yanran Guo, Xiujuan Wang, Xiaoming He\**

\*To whom correspondence should be addressed

Key Laboratory of Applied Surface and Colloid Chemistry (Ministry of Education), School of Chemistry and Chemical Engineering, Shaanxi Normal University, Xi'an 710119, P.R. China

\*Corresponding Author Email: xmhe@snnu.edu.cn

## 1. Materials

Ethyl isocyanate were purchased from Adamas. Poly(vinylidene fluoride) (PVDF), Ketjenblack(ECP-600JD) were obtained from Shenzhen Kejing Zhida Technology Co., Ltd. The lithium chip, CR2032 battery case and separator (Celgard2400) were purchased from DoDoChem. PVDF and Ketjen Black (ECP-600JD) were dried at 80 °C for 12 h under vacuum oven before use. 3,7-diamino-N-methyl phenothiazine (MPT-NH<sub>2</sub>) was prepared according to reported literature.<sup>S1</sup>All other reagents or solvents were used without further purification, unless indicated otherwise.

## 2. Instruments

<sup>1</sup>H NMR and <sup>13</sup>C NMR spectra were obtained on 600 MHz BRUKER spectrometer. Mass spectrometry data were collected on a Bruker maxis UHR-TOF mass spectrometer. IR spectra were obtained on a PE-Frontier instrument. Thermogravimetric analysis (TGA) was performed under nitrogen atmosphere from 25 to 800 °C with a heating rate of 10 °C min<sup>-1</sup>. EPR spectra were recorded on a Bruker E500 EPR spectrometer. The X-ray photoelectron spectra (XPS) experiments were carried out on a PHI-5400 electron spectrometer. Theoretical calculations were carried out at the B3LYP/6-31G(d, p) level by using the GAUSSIAN 09 suite of programs.<sup>S2</sup>

## 3. Synthesis of MPT-U

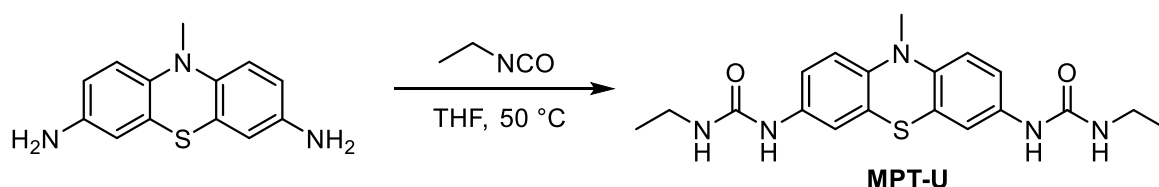

**Scheme S1.** Synthesis of MPT-U.

To a solution of 3,7-diamino-N-methyl phenothiazine (**MPT-NH<sub>2</sub>**, 0.5 g, 2.06 mmol) in THF (25 mL), was added ethyl isocyanate (0.44 g, 6.20 mmol). The reaction mixture was stirred at 50 °C for 24 h. During the reaction, large white precipitation formed. After cooling down to room temperature, the product was collected by filtration and washed with THF. Yield: 0.78 g, 98 %. <sup>1</sup>H NMR (600 MHz, DMSO-*d*<sub>6</sub>):  $\delta$ /ppm = 8.28 (s, 2H; NH), 7.32 (s, 2H; ArH), 7.11 (d, *J* = 8.4 Hz, 2H; ArH), 6.79 (d, *J* = 8.4 Hz, 2H; ArH), 6.02 (s, 2H; NH), 3.21 (s, 3H; NCH<sub>3</sub>), 3.08 (t, *J* = 6.6 Hz, 4H; CH<sub>2</sub>), 1.04 (t, *J* = 6.6 Hz, 6H; CH<sub>3</sub>). <sup>13</sup>C NMR (150 MHz, DMSO-*d*<sub>6</sub>):  $\delta$ /ppm = 155.62, 140.05, 135.83, 122.44, 117.50, 116.86, 114.58, 35.30, 34.44, 15.94. HR-MS: *m/z* calculated for C<sub>19</sub>H<sub>24</sub>N<sub>5</sub>O<sub>2</sub>S [M+H]<sup>+</sup> 386.1645, found 386.1649.

#### 4. Battery Fabrication and Testing

The working electrodes were prepared by mixing the active material (MPT-U), conductive Ketjenblack (ECP-600JD), and PVDF binder in a weight ratio of 5:4:1 with NMP as a solvent. The resulting ink was cast onto the carbon-coating aluminum foil to prepare electrodes. The prepared electrodes were dried in a vacuum oven at 80 °C for 12 h to remove residual solvent. Then, the electrodes were cut into disks with a diameter of 12 mm and the mass loading of the active material was about 0.6-1.0 mg cm<sup>-2</sup>. CR2032 coin-type coin cells were assembled in an argon-filled glove box. A lithium foil with a diameter of 16 mm was used as a counter electrode, a microporous polypropylene membrane (Celgard2400) was employed as a separator, and 3 M LiClO<sub>4</sub> in EC/DEC (1:1, v/v) was used as the electrolyte. The battery was left to stand for 12 hours before testing.

The battery performance data were measured on a LAND CT2001A battery system at 30°C with the voltage range of 2.5–4.4V. Cyclic voltammetry (CV) and electrochemical impedance spectroscopy

(EIS) tests of the batteries were performed on a CHI760E electrochemical workstation. Galvanostatic charge and discharge (GCD) and galvanostatic intermittent titration technique (GITT) tests were carried out using LANHE-CT2001A system (Wuhan, China) in the potential ranging from 2.5 to 4.4 V (vs. Li/Li<sup>+</sup>) at different current densities.

## 5. Calculations of the Electrochemical Metrics

Theoretical capacity ( $C_{\text{theor}}$ , mAh g<sup>-1</sup>) was calculated according to the equation (1):

$$C_{\text{theor}} = \frac{nF}{3.6 \times M} \quad (1)$$

where  $n$  is the number of electrons transferred per molecules,  $F$  is the Faraday's constant (96484 C mol<sup>-1</sup>),  $M$  is molecular weight of the molecules.

The  $b$ -value and capacitive contribution at a particular potential were determined as follows:

The relationship between scan rate ( $v$ , mV s<sup>-1</sup>) in a CV and the corresponding cathodic or anodic peak current ( $i_p$ , A g<sup>-1</sup>) is shown in equation (2).<sup>S3</sup> The  $b$ -value was the slope of the  $\log(v)$ - $\log(i_p)$  plots according to equation (3).

$$i_p = av^b \quad (2)$$

$$\log(i_p) = \log(a) + b \log(v) \quad (3)$$

where  $a$  and  $b$  are adjustable parameters.

Moreover, the relationship between the current at a particular potential ( $i(V)$ , A g<sup>-1</sup>) and the scan rate ( $v$ , mV s<sup>-1</sup>) is shown in equation (4).<sup>S4</sup> Solving for the values of  $k_1$  and  $k_2$  at each potential, we can obtain the percentage of capacitive contribution the total current ( $k_2v/i(V)$ ).

$$i(V) = k_1v^{1/2} + k_2v \quad (4)$$

## 6. Calculation of ion diffusion coefficients ( $D$ , cm<sup>2</sup> s<sup>-1</sup>) from GITT

The value of ion diffusion coefficients could be calculated by the following equation: <sup>S5</sup>

$$D_{ClO_4^-} = \frac{4}{\pi\tau} \left( \frac{V_m m_B}{SM_m} \right)^2 \left( \frac{\Delta E_s}{\Delta E_t} \right)^2$$

where  $\tau$  is the duration of the current pulse (s),  $V_m$  is the molar volume of the active material ( $\text{cm}^3 \text{mol}^{-1}$ ),  $m_B$  is the mass of the active material in the electrolyte (g),  $M_m$  is the molar mass of active material ( $\text{g mol}^{-1}$ ),  $S$  is the contact surface area ( $\text{cm}^2$ ) between electrode and electrolyte,  $\Delta E_s$  is the equilibrium potential change induced by current pulse,  $\Delta E_t$  is the potential variation during the constant current pulse.

## 7. Supplementary Schemes, Figures and Tables

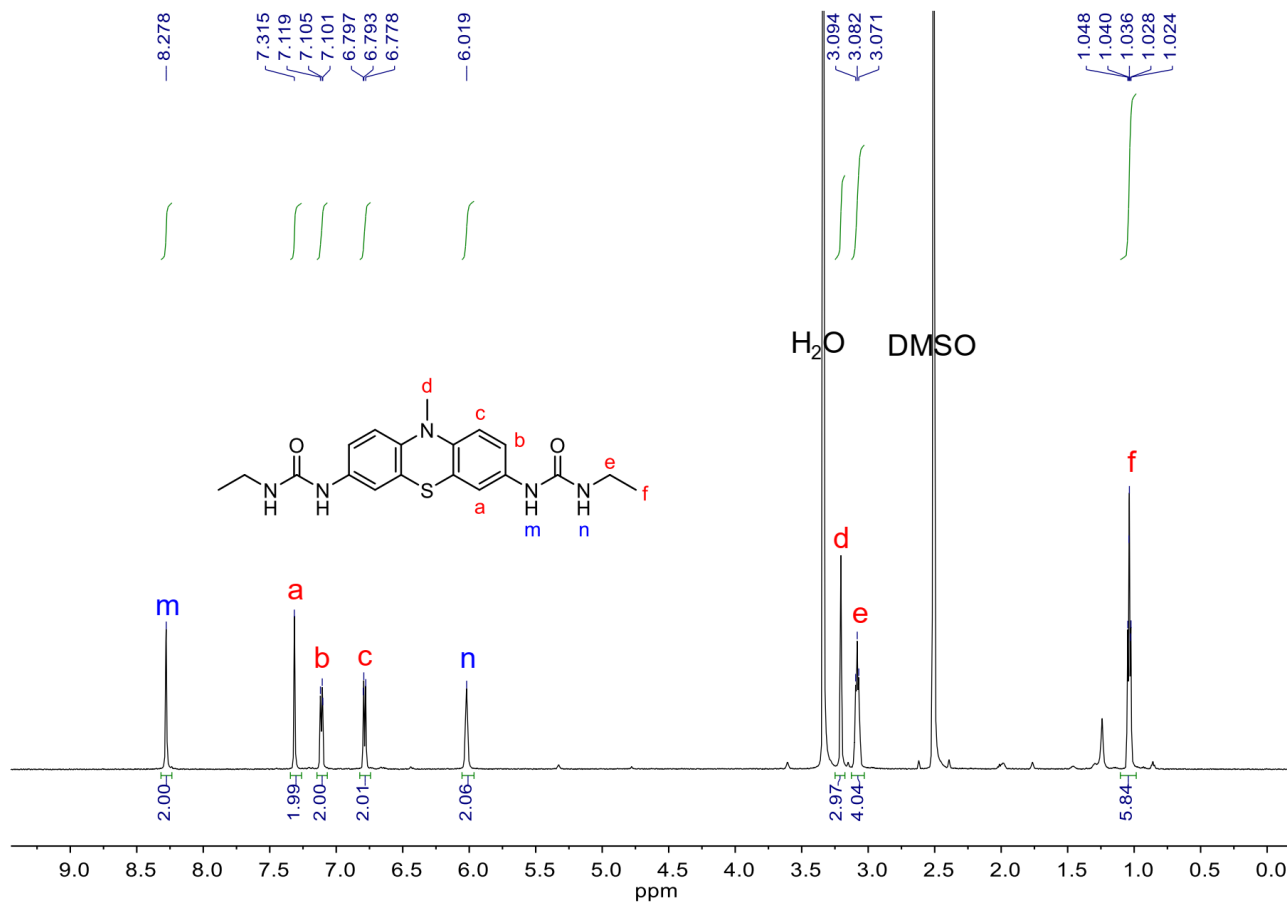

**Figure S1.**  $^1\text{H}$  NMR spectrum of MPT-U in  $\text{DMSO-}d_6$ .

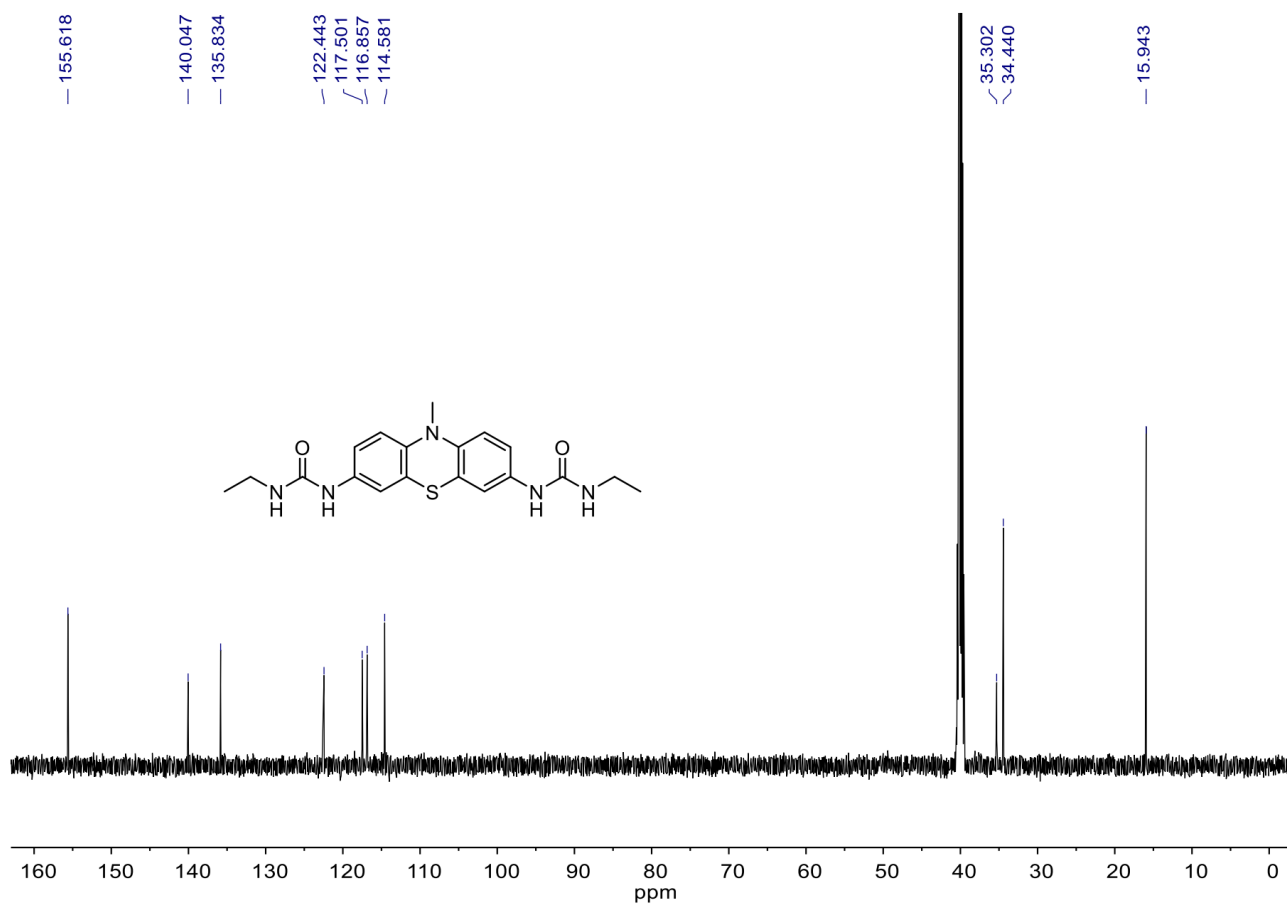

**Figure S2.**  $^{13}\text{C}$  NMR spectrum of MPT-U in  $\text{DMSO-}d_6$ .

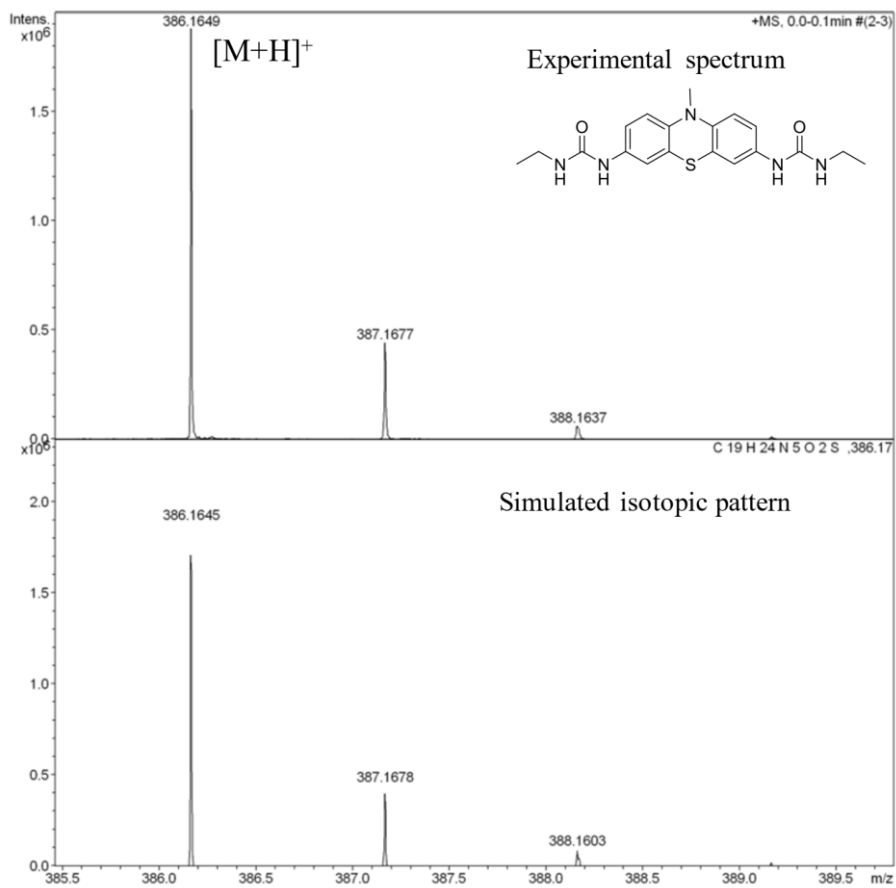

**Figure S3.** Mass spectrum of MPT-U in DMSO- $d_6$ .

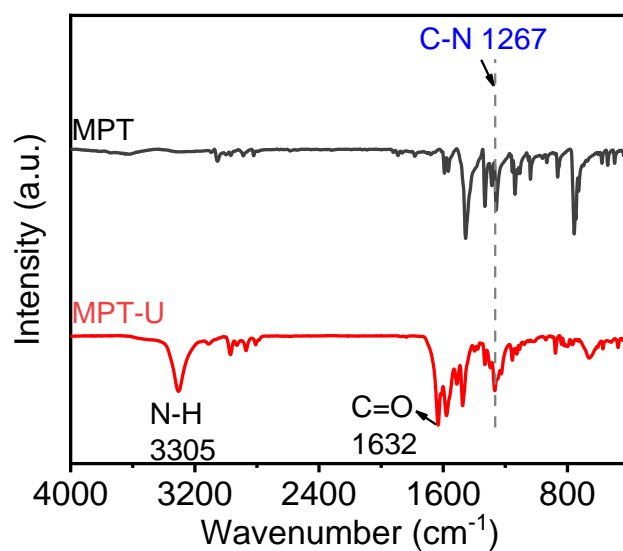

**Figure S4.** FT-IR spectra of MPT and MPT-U.

## Solubility Test

**Solubility of MPT:** To 50 mg of MPT, EC/DEC (1:1, v/v) electrolyte was gradually added in 100  $\mu\text{L}$  portions at 5-minute intervals until the MPT was fully dissolved.

**Solubility of MPT-U:** First, UV-vis spectra of MPT-U in DMSO at various concentrations were measured to construct a standard curve. Then, the UV-vis spectrum of MPT-U in a saturated EC/DEC (1:1, v/v) electrolyte was measured, and the solubility was calculated based on the standard curve (see Figure below).

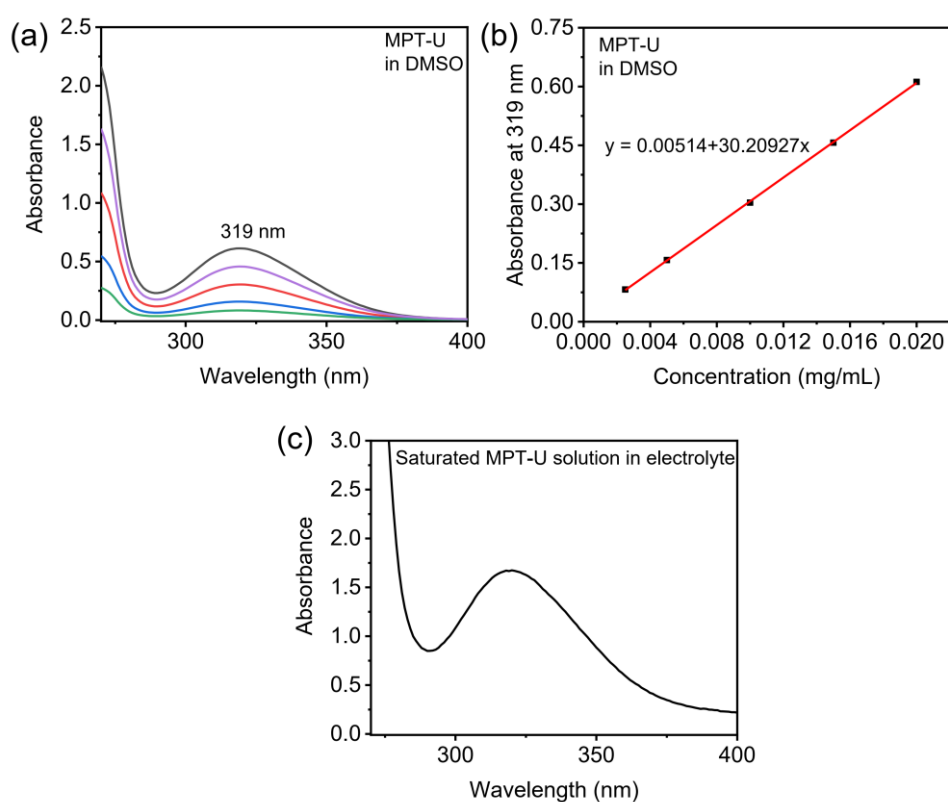

**Figure S5.** (a) UV-vis spectra of MPT-U in DMSO at different concentrations and (b) fitting curve of absorbance at 319 nm with concentration. (c) UV-vis spectrum of MPT-U in saturated EC/DEC (1:1, v/v) electrolyte solution.

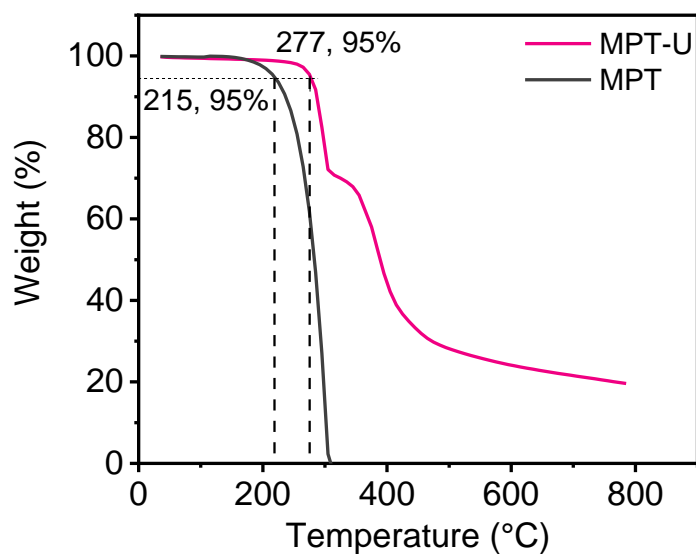

**Figure S6.** TGA curves of MPT and MPT-U.

*Additional discussion:* MPT begins to lose weight at ca. 170 °C and retains no weight when reaching 300 °C, indicating its high sublimability. In contrast, MPT-U exhibits high thermal stability, with their decomposition temperatures ( $T_d$ ) of 277 °C.

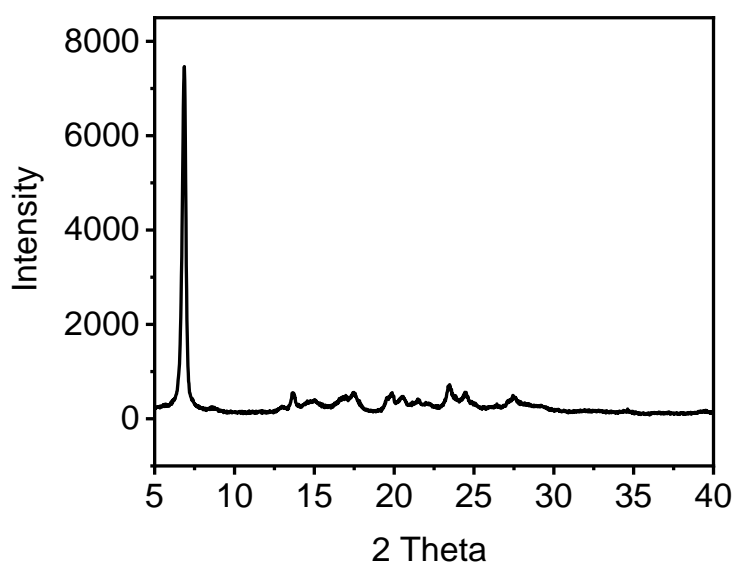

**Figure S7.** XRD spectrum of MPT-U.

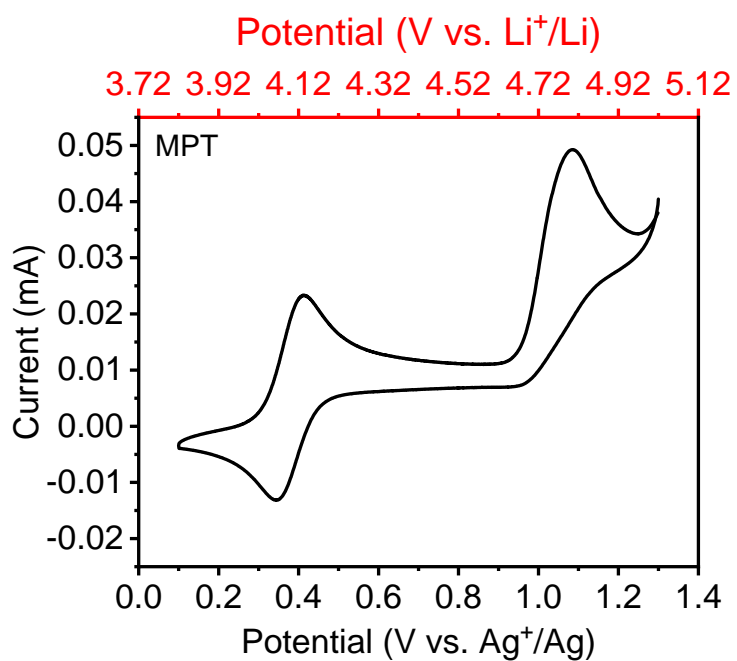

**Figure S8.** Cyclic voltammograms of MPT in CH<sub>3</sub>CN solution (*c* = 1 mM) with 0.1 M *n*Bu<sub>4</sub>NPF<sub>6</sub> as a supporting electrolyte at a scan rate of 100 mV s<sup>-1</sup>.  $E(\text{vs Li}^+/\text{Li}) = E(\text{vs Ag}^+/\text{Ag}) + 3.72 \text{ V}$ .

**Table S1.** Electrochemical comparison of current work and other reported phenothiazine-based organic cathodes in the literature for LOBs.

| Materials (reference)                                                                                                                                                         | Electrode Composition                          | $C_{thero}$ (mAh g <sup>-1</sup> ) | Specific capacity (mAh g <sup>-1</sup> ) (Current)                                                                                                                               | Cycle Stability Retention /Cycles / Current                   | Redox Window (V) |
|-------------------------------------------------------------------------------------------------------------------------------------------------------------------------------|------------------------------------------------|------------------------------------|----------------------------------------------------------------------------------------------------------------------------------------------------------------------------------|---------------------------------------------------------------|------------------|
| 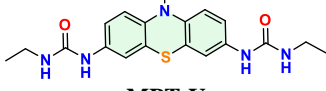 <p><b>MPT-U</b><br/>This work</p>                                                           | active material:<br>ketjenblack: PVDF = 5:4:1  | 139                                | 106 (0.2 A g <sup>-1</sup> )<br>93 (0.5 A g <sup>-1</sup> )<br>88 (1 A g <sup>-1</sup> )<br>84 (2 A g <sup>-1</sup> )<br>74 (5 A g <sup>-1</sup> )<br>61 (10 A g <sup>-1</sup> ) | 73%/400/0.2 A g <sup>-1</sup><br>69%/2000/2 A g <sup>-1</sup> | 2.5-4.4 V        |
|  <p><b>PVMPT</b><br/><i>Energy Environ. Sci.</i>, <b>2017</b>, <i>10</i>, 2334-2341.</p>     | active material:<br>Super P: PVDF = 5:4.7: 0.3 | 112                                | 56 (1 C)<br>50 (10 C)<br>26 (100 C)<br><br>1 C = 112 mAh g <sup>-1</sup>                                                                                                         | 100%/1000/1 C<br>93.5%/10000/10 C                             | 3-4 V            |
|  <p><b>X-PVMPT</b><br/><i>Adv. Energy Mater.</i> <b>2018</b>, <i>8</i>, 1802151.</p>        | active material:<br>Super P: PVDF = 5:4: 1     | 112                                | 107 (1 C)<br>85 (10 C)<br>70 (20 C)<br><br>1 C = 112 mAh g <sup>-1</sup>                                                                                                         | 95%/1000/1 C<br>95%/1000/10 C                                 | 3-4 V            |
|  <p><b>P1a</b><br/><i>Adv. Funct. Mater.</i> <b>2019</b>, <i>29</i>, 1906436.</p>          | active material:<br>Super P: PVDF = 6:3.5: 0.5 | 36.4                               | 34.7 (1 C)<br>32.7 (10 C)<br><br>1 C = 36 mAh g <sup>-1</sup>                                                                                                                    | 100%/100/1 C<br>100%/2200/10 C<br>97.5%/30000/100 C           | 3.2-3.9V         |
|  <p><b>P2</b><br/><i>Adv. Funct. Mater.</i> <b>2019</b>, <i>29</i>, 1906436.</p>           | active material:<br>Super P: PVDF = 6:3.5: 0.5 | 36.4                               | 33.4 (1 C)<br>30.9 (10 C)<br><br>1 C = 36 mAh g <sup>-1</sup>                                                                                                                    | 98%/100/1 C<br>72%/2200/10 C                                  | 3.2-3.9V         |
|  <p><b>P3</b><br/><i>Adv. Funct. Mater.</i> <b>2019</b>, <i>29</i>, 1906436.</p>           | active material:<br>Super P: PVDF = 6:3.5: 0.5 | 35.1                               | 31.0 (1 C)<br><br>1 C = 35 mAh g <sup>-1</sup>                                                                                                                                   | 100%/100/1 C                                                  | 3.2-3.9V         |
|  <p><b>PT-DMP</b><br/><i>ACS Appl. Energy Mater.</i> <b>2018</b>, <i>1</i>, 3560-3564.</p> | active material:<br>Super P: PVDF = 7:2: 1     | 156                                | 128 (1 C)<br><br>1 C = 156 mAh g <sup>-1</sup>                                                                                                                                   | 64%/50/1 C                                                    | 2.8-4.3V         |

|                                                                                                                                                                               |                                                    |     |                                                        |                             |          |
|-------------------------------------------------------------------------------------------------------------------------------------------------------------------------------|----------------------------------------------------|-----|--------------------------------------------------------|-----------------------------|----------|
| 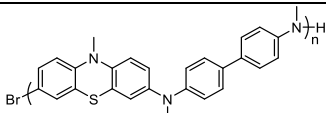 <p><b>PT-BZ</b><br/><i>ACS Appl. Energy Mater.</i> <b>2018</b>, <i>1</i>, 3560-3564.</p>    | active material:<br>Super P: PVDF = 7:<br>2: 1     | 127 | 97 (1 C)<br>1 C = 156 mAh g <sup>-1</sup>              | 66%/50/1 C                  | 2.8-4.3V |
|  <p><i>ACS Appl. Energy Mater.</i> <b>2018</b>, <i>1</i>, 3560-3564.</p>                     | active material:<br>Super P: PVDF = 7:<br>2: 1     | 155 | 150 (5 C)<br>1 C = 155 mAh g <sup>-1</sup>             | 74%/50/5 C                  | 2.8-4.3V |
|  <p><b>PNMPT (and X-PNMPT)</b><br/><i>ChemSusChem</i> <b>2020</b>, <i>13</i>, 2232-2238.</p> | active material:<br>Super P: PVDF = 5:<br>4.5: 0.5 | 88  | 69 (1 C)<br>1 C = 88 mAh g <sup>-1</sup>               | 97%/300/1 C<br>81%/1000/1 C | 3.3-3.9V |
|  <p><b>P1</b><br/><i>ChemSusChem</i> <b>2020</b>, <i>13</i>, 2232-2238.</p>                 | active material:<br>Super P: PVDF = 5:<br>4.5: 0.5 | 74  | 62 (1 C)<br>1 C = 74 mAh g <sup>-1</sup>               | 45%/300/1 C                 | 3.3-3.9V |
|  <p><b>P2</b><br/><i>ChemSusChem</i> <b>2020</b>, <i>13</i>, 2232-2238.</p>                | active material:<br>Super P: PVDF = 5:<br>4.5: 0.5 | 86  | 73 (1 C)<br>1 C = 86 mAh g <sup>-1</sup>               | 45%/300/1 C                 | 3.3-3.9V |
|  <p><b>3PTZ</b><br/><i>Energy Environ. Sci.</i> <b>2020</b>, <i>13</i>, 4142-4156.</p>     | active material:<br>Super P: PVDF = 4:<br>4: 2     | 120 | 31 (1 C)<br>9 (20 C)<br>1 C = 120 mAh g <sup>-1</sup>  | 66%/100/1 C                 | 3-4V     |
|  <p><b>3PXZ</b><br/><i>Energy Environ. Sci.</i> <b>2020</b>, <i>13</i>, 4142-</p>          | active material:<br>Super P: PVDF = 4:<br>4: 2     | 129 | 99 (1 C)<br>76 (20 C)<br>1 C = 120 mAh g <sup>-1</sup> | 65%/100/1 C                 | 3-4V     |

|                                                                                                                                                                                                       |                                                         |            |                                                                                                   |                     |                 |
|-------------------------------------------------------------------------------------------------------------------------------------------------------------------------------------------------------|---------------------------------------------------------|------------|---------------------------------------------------------------------------------------------------|---------------------|-----------------|
| <p>4156.</p> 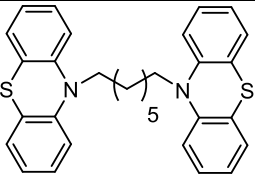 <p><b>2PTZ-C<sub>7</sub>H<sub>14</sub></b><br/><i>Adv. Mater.</i> <b>2024</b>, <i>36</i>, 2312486.</p> | <p>active material:<br/>Super P: PVDF = 4:<br/>4: 2</p> | <p>104</p> | <p>98 (1 C)<br/>64 (10 C)</p>                                                                     | <p>60%/1000/1 C</p> | <p>3-4V</p>     |
|  <p><b>P-PhPTZOMe</b><br/><i>J. Power Sources</i> <b>2024</b>, <i>612</i>, 234779.</p>                               | <p>active material:<br/>Super P: PVDF = 9:<br/>1: 1</p> | <p>148</p> | <p>109 (1 C)<br/>101 (10 C)<br/>94 (20 C)</p> <p>1 C = 148 mAh g<sup>-1</sup></p>                 | <p>81%/800/1 C</p>  | <p>2.8-4.1V</p> |
|  <p><b>X-PSDMPT</b><br/><i>ACS Appl. Polym. Mater.</i> <b>2024</b>, <i>6</i>, 7956-7968.</p>                         | <p>active material:<br/>Super P: PVDF = 6:<br/>3: 1</p> | <p>143</p> | <p>125 (0.5 C)<br/>123 (1 C)<br/>56 (50 C)<br/>10 (100 C)</p> <p>1 C = 143 mAh g<sup>-1</sup></p> | <p>96%/550/1 C</p>  | <p>3.1-4.2V</p> |

## References

- [S1] Zhang, S.; Cai, J.; Li, H.; Xing, F.; Chen, L.; Wang, X.; He, X. Two-Electron Phenothiazine Based Cathode Achieved by Raising HOMO Energy Level for High Performance Lithium Organic Battery. *Adv. Energy Mater.* **2025**, *15*, 2403029.
- [S2] Frisch, M. J.; Trucks, G. W.; Schlegel, H. B.; Scuseria, G. E.; Robb, M. A.; Cheeseman, J. R.; Scalmani, G.; Barone, V.; Petersson, G. A.; Nakatsuji, H.; Li, X.; Caricato, M.; Marenich, A. V.; Bloino, J.; Janesko, B. G.; Gomperts, R.; Mennucci, B.; Hratchian, H. P.; Ortiz, J. V.; Izmaylov, A. F.; Sonnenberg, J. L.; Williams-Young, D.; Ding, F.; Lipparini, F.; Egidi, F.; Goings, J.; Peng, B.; Petrone, A.; Henderson, T.; Ranasinghe, D.; Zakrzewski, V. G.; Gao, J.; Rega, N.; Zheng, G.; Liang, W.; Hada, M.; Ehara, M.; Toyota, K.; Fukuda, R.; Hasegawa, J.; Ishida, M.; Nakajima, T.; Honda, Y.; Kitao, O.; Nakai, H.; Vreven, T.; Throssell, K.; Montgomery, J. A., Jr.; Peralta, J. E.; Ogliaro, F.; Bearpark, M. J.; Heyd, J. J.; Brothers, E. N.; Kudin, K. N.; Staroverov, V. N.; Keith, T. A.; Kobayashi, R.; Normand, J.; Raghavachari, K.; Rendell, A. P.; Burant, J. C.; Iyengar, S. S.; Tomasi, J.; Cossi, M.; Millam, J. M.; Klene, M.; Adamo, C.; Cammi, R.; Ochterski, J. W.; Martin, R. L.; Morokuma, K.; Farkas, O.; Foresman, J. B.; Fox, D. J., Gaussian, Inc., Wallingford, CT, USA, **2016**.
- [S3] Lindström, H.; Södergren, S.; Solbrand, A.; Rensmo, H.; Hjelm, J.; Hagfeldt, A.; Lindquist, S.-E. Li<sup>+</sup> Ion Insertion in TiO<sub>2</sub> (Anatase). 2. Voltammetry on Nanoporous Films. *J. Phys. Chem. B* **1997**, *101*, 7717-7722.
- [S4] Liu, T. C.; Pell, W. G.; Conway, B. E.; Roberson, S. L. Behavior of Molybdenum Nitrides as Materials for Electrochemical Capacitors: Comparison with Ruthenium Oxide. *J. Electrochem. Soc.* **1998**, *145*, 1882-1888.

[S5] (a) Luo, L.-W.; Ma, W.; Dong, P.; Huang, X.; Yan, C.; Han, C.; Zheng, P.; Zhang, C.; Jiang, J.-X. Synthetic Control of Electronic Property and Porosity in Anthraquinone-Based Conjugated Polymer Cathodes for High-Rate and Long-Cycle-Life Na–Organic Batteries. *ACS Nano* **2022**, *16*, 14590-14599. (b) Wang, Y.; Bai, P.; Li, B.; Zhao, C.; Chen, Z.; Li, M.; Su, H.; Yang, J.; Xu, Y. Ultralong Cycle Life Organic Cathode Enabled by Ether-Based Electrolytes for Sodium-Ion Batteries. *Adv. Energy Mater.* **2021**, *11*, 2101972. (c) Tao, R.; Zhang, T.; Tan, S.; Jafta, C. J.; Li, C.; Liang, J.; Sun, X.-G.; Wang, T.; Fan, J.; Lu, Z.; Bridges, C. A.; Suo, X.; Do-Thanh, C.-L.; Dai, S. Insight into the Fast-Rechargeability of a Novel  $\text{Mo}_{1.5}\text{W}_{1.5}\text{Nb}_{14}\text{O}_{44}$  Anode Material for High-Performance Lithium-Ion Batteries. *Adv. Energy Mater.* **2022**, *12*, 2200519.
